# Supplementary material for: Causal attribution fractions, and the attribution of smoking and BMI to the landscape of disease incidence in UK Biobank
Source: bioRxiv or medRxiv preprint supplement (doi:10.1101/2021.12.24.21268368), 2022-09-28
Supplement: Supplementary file [file media-1.pdf]

# Supplementary Material

## Causal attribution fractions for epidemiological studies, applied to a UK Biobank study of smoking and BMI

A.J. Webster

December 24, 2021

### Sensitivity analysis

As discussed in the main text, participants with hospital reports of prior cancers other than non-melanoma skin cancers were excluded from the main study, but self-reported cancers or other prior diseases were not. A sensitivity analysis compared the paper's main results with a second analysis that excluded participants who had reported any cancer other than non-melanoma skin cancer, or any serious cardiovascular disease from heart disease, stroke, arterial or pulmonary embolisms, or subarachnoid haemorrhage. As discussed in the main text, depending on the disease and exposure, the extra exclusions can in principle either weaken or strengthen associations.

The tables are equivalent to the main text, but with values calculated from the sensitivity analysis, allowing estimates to be compared.

The figures are from equivalent analyses to those in the main text. The main differences are driven by differences in the number of statistically significant associations with BMI or smoking, that led to small differences in the numbers of diseases that are summarised in the figures.

| Disease                                                                            | Sex | N    | $N_{A_f}$ | $A_f$ | Old rank $A_f$ |
|------------------------------------------------------------------------------------|-----|------|-----------|-------|----------------|
| E66 Obesity                                                                        | F   | 273  | 268       | 0.98  | 1              |
| J44.1 Chronic obstructive pulmonary disease with acute exacerbation, unspecified   | F   | 166  | 152       | 0.92  | 2              |
| J44.0 Chronic obstructive pulmonary disease with acute lower respiratory infection | F   | 345  | 306       | 0.89  | 3              |
| J44.0 Chronic obstructive pulmonary disease with acute lower respiratory infection | M   | 337  | 298       | 0.88  | 4              |
| J44.1 Chronic obstructive pulmonary disease with acute exacerbation, unspecified   | M   | 209  | 184       | 0.88  | 5              |
| C34 Malignant neoplasm of bronchus and lung                                        | M   | 849  | 687       | 0.81  | 6              |
| I70 Atherosclerosis                                                                | M   | 139  | 100       | 0.72  | 7              |
| C34 Malignant neoplasm of bronchus and lung                                        | F   | 848  | 609       | 0.72  | 8              |
| E11 Non-insulin-dependent diabetes mellitus                                        | M   | 174  | 97        | 0.56  | 9              |
| I71 Aortic aneurysm and dissection                                                 | M   | 361  | 194       | 0.54  | 10             |
| R04.2 Haemoptysis                                                                  | M   | 279  | 146       | 0.52  | 11             |
| C15 Malignant neoplasm of oesophagus                                               | M   | 419  | 195       | 0.47  | 12             |
| R91 Abnormal findings on diagnostic imaging of lung                                | M   | 309  | 134       | 0.43  | 13             |
| C67 Malignant neoplasm of bladder                                                  | M   | 921  | 365       | 0.40  | 14             |
| R91 Abnormal findings on diagnostic imaging of lung                                | F   | 323  | 130       | 0.40  | 15             |
| I50 Heart failure                                                                  | F   | 239  | 115       | 0.48  | 16             |
| K42 Umbilical hernia                                                               | F   | 282  | 104       | 0.37  | 17             |
| G47.3 Sleep apnoea                                                                 | F   | 352  | 122       | 0.35  | 18             |
| J84 Other interstitial pulmonary diseases                                          | F   | 161  | 56        | 0.35  | 19             |
| I50 Heart failure                                                                  | M   | 305  | 100       | 0.33  | 20             |
| R04.2 Haemoptysis                                                                  | F   | 222  | 76        | 0.34  | 21             |
| J10 Influenza due to identified influenza virus                                    | F   | 181  | 49        | 0.27  | 22             |
| M13 Other arthritis                                                                | M   | 204  | 67        | 0.33  | 23             |
| R29.6 Tendency to fall, not elsewhere classified                                   | M   | 147  | 61        | 0.41  | 24             |
| A41 Other septicaemia                                                              | F   | 812  | 240       | 0.30  | 25             |
| J18 Pneumonia, organism unspecified                                                | M   | 2505 | 790       | 0.32  | 26             |
| C22 Malignant neoplasm of liver and intrahepatic bile ducts                        | M   | 144  | 40        | 0.28  | 27             |
| L72.0 Epidermal cyst                                                               | M   | 401  | 121       | 0.30  | 28             |
| J18 Pneumonia, organism unspecified                                                | F   | 2400 | 705       | 0.29  | 29             |
| G47.3 Sleep apnoea                                                                 | M   | 688  | 216       | 0.31  | 30             |
| N17 Acute renal failure                                                            | F   | 282  | 73        | 0.26  | 31             |
| G44.2 Tension-type headache                                                        | F   | 138  | 41        | 0.30  | 32             |
| K43 Ventral hernia                                                                 | F   | 342  | 92        | 0.27  | 33             |
| G62 Other polyneuropathies                                                         | M   | 148  | 44        | 0.30  | 34             |
| C16 Malignant neoplasm of stomach                                                  | M   | 229  | 47        | 0.21  | 35             |
| B37 Candidiasis                                                                    | M   | 145  | 44        | 0.30  | 36             |
| R06.0 Dyspnoea                                                                     | M   | 555  | 128       | 0.23  | 37             |
| I26 Pulmonary embolism                                                             | F   | 756  | 221       | 0.29  | 38             |
| R63.4 Abnormal weight loss                                                         | F   | 441  | 121       | 0.27  | 39             |
| J84 Other interstitial pulmonary diseases                                          | M   | 208  | 57        | 0.27  | 40             |
| J22 Unspecified acute lower respiratory infection                                  | F   | 1263 | 283       | 0.22  | 41             |
| E87.1 Hypo-osmolality and hyponatraemia                                            | M   | 193  | 43        | 0.22  | 42             |
| I25.9 Chronic ischaemic heart disease, unspecified                                 | M   | 231  | 65        | 0.28  | 43             |
| M48 Other spondylopathies                                                          | F   | 525  | 140       | 0.27  | 44             |
| K62.1 Rectal polyp                                                                 | M   | 1047 | 248       | 0.24  | 45             |
| N17 Acute renal failure                                                            | M   | 434  | 72        | 0.17  | 46             |
| H02.4 Ptosis of eyelid                                                             | M   | 225  | 55        | 0.25  | 47             |
| C90 Multiple myeloma and malignant plasma cell neoplasms                           | F   | 229  | 58        | 0.25  | 48             |
| M47 Spondylosis                                                                    | M   | 293  | 72        | 0.25  | 49             |
| L60 Nail disorders                                                                 | F   | 205  | 47        | 0.23  | 50             |
| R13 Dysphagia                                                                      | M   | 880  | 180       | 0.21  | 51             |
| J90 Pleural effusion, not elsewhere classified                                     | M   | 443  | 96        | 0.22  | 52             |
| J22 Unspecified acute lower respiratory infection                                  | M   | 1117 | 187       | 0.17  | 53             |
| L03 Cellulitis                                                                     | M   | 1766 | 362       | 0.20  | 54             |
| M81 Osteoporosis without pathological fracture                                     | F   | 849  | 181       | 0.21  | 55             |
| K92.0 Haematemesis                                                                 | M   | 126  | 22        | 0.18  | 56             |
| L03 Cellulitis                                                                     | F   | 1413 | 292       | 0.21  | 57             |
| K25 Gastric ulcer                                                                  | M   | 300  | 54        | 0.18  | 58             |
| I64 Stroke, not specified as haemorrhage or infarction                             | M   | 158  | 28        | 0.18  | 59             |

Table 1: Table 1 of the main text is recalculated for the sensitivity analysis using Eq. 19. Colours:  $A_f \geq 0.5$  (red),  $0.5 > A_f \geq 0.35$  (orange),  $0.35 > A_f \geq 0.2$  (yellow). Sex: diseases in males (M) or females (F),  $N$ : total cases,  $N_{A_f}$ : attributed cases.

| Disease                                            | Sex | N    | $N_{A_f}$ | $A_f$ | Old rank | $A_f$ |
|----------------------------------------------------|-----|------|-----------|-------|----------|-------|
| E66 Obesity                                        | F   | 273  | 267       | 0.98  | 1        |       |
| E11 Non-insulin-dependent diabetes mellitus        | M   | 174  | 79        | 0.45  | 2        |       |
| K42 Umbilical hernia                               | F   | 282  | 111       | 0.39  | 3        |       |
| G47.3 Sleep apnoea                                 | F   | 352  | 107       | 0.30  | 4        |       |
| I50 Heart failure                                  | M   | 305  | 83        | 0.27  | 5        |       |
| G62 Other polyneuropathies                         | M   | 148  | 41        | 0.27  | 6        |       |
| M13 Other arthritis                                | M   | 204  | 55        | 0.27  | 7        |       |
| I50 Heart failure                                  | F   | 239  | 81        | 0.34  | 8        |       |
| I26 Pulmonary embolism                             | F   | 756  | 193       | 0.26  | 9        |       |
| G47.3 Sleep apnoea                                 | M   | 688  | 158       | 0.23  | 10       |       |
| J22 Unspecified acute lower respiratory infection  | F   | 1263 | 260       | 0.21  | 11       |       |
| I25.9 Chronic ischaemic heart disease, unspecified | M   | 231  | 52        | 0.22  | 13       |       |
| M81 Osteoporosis without pathological fracture     | F   | 849  | 168       | 0.20  | 14       |       |

Table 2: BMI only: Table 4 of the main text is recalculated for the sensitivity analysis using Eq. 19. Sex indicates diseases in males (M) or females (F),  $N$  are total cases,  $N_{A_f}$  are cases attributed to BMI,  $A_f$  is the attributable fraction for deviations from the mid-tertile of BMI. For obesity, unsurprisingly  $A_f \simeq 1$ . Reporting errors may have prevented  $A_f = 1$  for obesity.

| Disease                                                                            | Sex | N    | $N_{A_f}$ | $A_f$ | Old rank | $A_f$ |
|------------------------------------------------------------------------------------|-----|------|-----------|-------|----------|-------|
| J44.1 Chronic obstructive pulmonary disease with acute exacerbation, unspecified   | F   | 166  | 150       | 0.90  | 1        |       |
| J44.0 Chronic obstructive pulmonary disease with acute lower respiratory infection | F   | 345  | 301       | 0.87  | 2        |       |
| J44.0 Chronic obstructive pulmonary disease with acute lower respiratory infection | M   | 337  | 288       | 0.86  | 3        |       |
| J44.1 Chronic obstructive pulmonary disease with acute exacerbation, unspecified   | M   | 209  | 180       | 0.86  | 4        |       |
| C34 Malignant neoplasm of bronchus and lung                                        | M   | 849  | 668       | 0.79  | 5        |       |
| I70 Atherosclerosis                                                                | M   | 139  | 102       | 0.73  | 6        |       |
| C34 Malignant neoplasm of bronchus and lung                                        | F   | 848  | 599       | 0.71  | 7        |       |
| I71 Aortic aneurysm and dissection                                                 | M   | 361  | 200       | 0.55  | 8        |       |
| R04.2 Haemoptysis                                                                  | M   | 279  | 114       | 0.41  | 9        |       |
| C15 Malignant neoplasm of oesophagus                                               | M   | 419  | 177       | 0.42  | 10       |       |
| R91 Abnormal findings on diagnostic imaging of lung                                | M   | 309  | 121       | 0.39  | 11       |       |
| C67 Malignant neoplasm of bladder                                                  | M   | 921  | 329       | 0.36  | 12       |       |
| R91 Abnormal findings on diagnostic imaging of lung                                | F   | 323  | 110       | 0.34  | 13       |       |
| J84 Other interstitial pulmonary diseases                                          | F   | 161  | 47        | 0.29  | 14       |       |
| B37 Candidiasis                                                                    | M   | 145  | 44        | 0.30  | 15       |       |
| J84 Other interstitial pulmonary diseases                                          | M   | 208  | 62        | 0.30  | 16       |       |
| J90 Pleural effusion, not elsewhere classified                                     | M   | 443  | 110       | 0.25  | 17       |       |
| R04.2 Haemoptysis                                                                  | F   | 222  | 55        | 0.25  | 18       |       |
| G56.2 Lesion of ulnar nerve                                                        | F   | 200  | 44        | 0.22  | 19       |       |
| K92.0 Haematemesis                                                                 | M   | 126  | 25        | 0.20  | 20       |       |
| C22 Malignant neoplasm of liver and intrahepatic bile ducts                        | M   | 144  | 33        | 0.23  | 21       |       |
| R29.6 Tendency to fall, not elsewhere classified                                   | M   | 147  | 37        | 0.25  | 22       |       |
| R06.0 Dyspnoea                                                                     | M   | 555  | 110       | 0.20  | 23       |       |
| J18 Pneumonia, organism unspecified                                                | M   | 2505 | 539       | 0.22  | 24       |       |
| C16 Malignant neoplasm of stomach                                                  | M   | 229  | 44        | 0.19  | 25       |       |
| H02.0 Entropion and trichiasis of eyelid                                           | M   | 290  | 59        | 0.20  | 26       |       |
| K62.1 Rectal polyp                                                                 | M   | 1047 | 209       | 0.20  | 27       |       |
| G44.2 Tension-type headache                                                        | F   | 138  | 24        | 0.17  | 28       |       |

Table 3: Smoking only: Table 4 of the main text is recalculated for the sensitivity analysis using Eq. 19. Sex indicates diseases in males (M) or females (F),  $N$  are total cases,  $N_{A_f}$  are cases attributed to smoking,  $A_f$  is the attributable fraction.

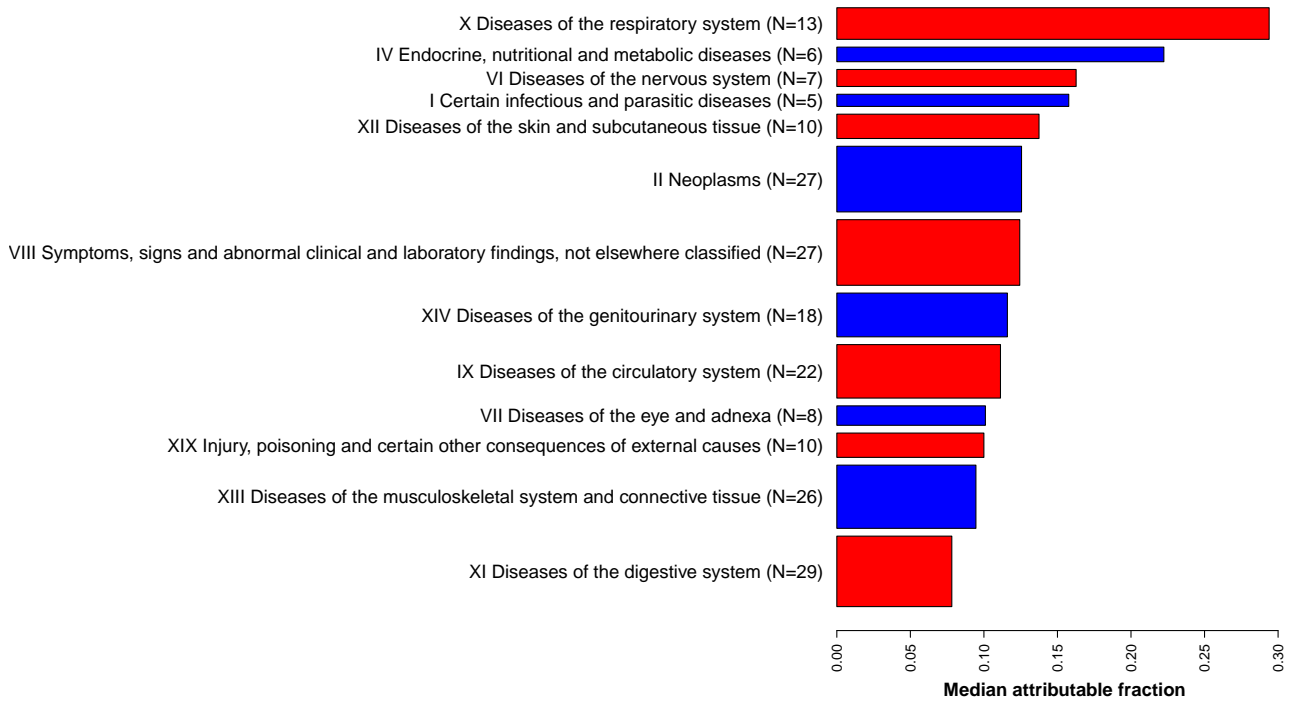

Figure 1: Median attributable fractions for each ICD-10 chapter with at least 5 diseases where  $A_f > 0.2$ . Bar widths are proportional to the number of diseases in each chapter.

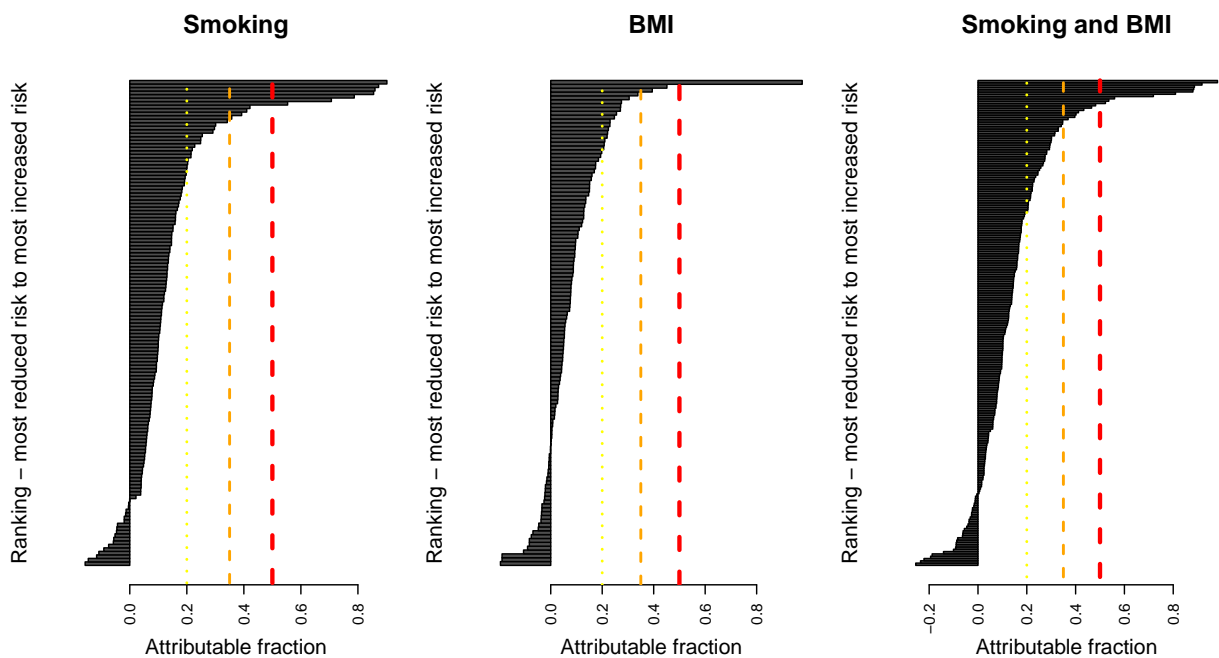

Figure 2: For diseases with a statistically significant association with smoking or BMI after an FDR multiple-testing adjustment, attributable fractions  $A_f$  were calculated with Eq. 19. Lines indicate  $A_f = 0.5$  (red),  $A_f = 0.35$  (orange),  $A_f = 0.2$  (yellow).  $A_f < 0$  indicates a protective association.

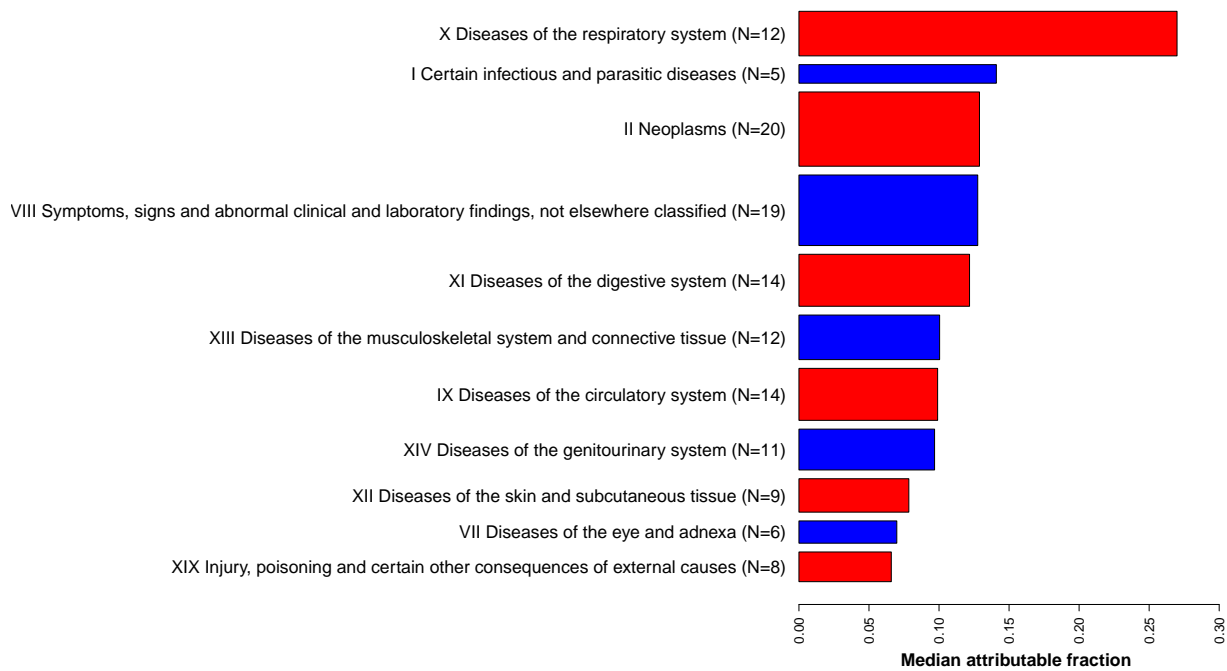

**Attribution fractions for smoking (existing UK Biobank population, versus if all never smoked)**

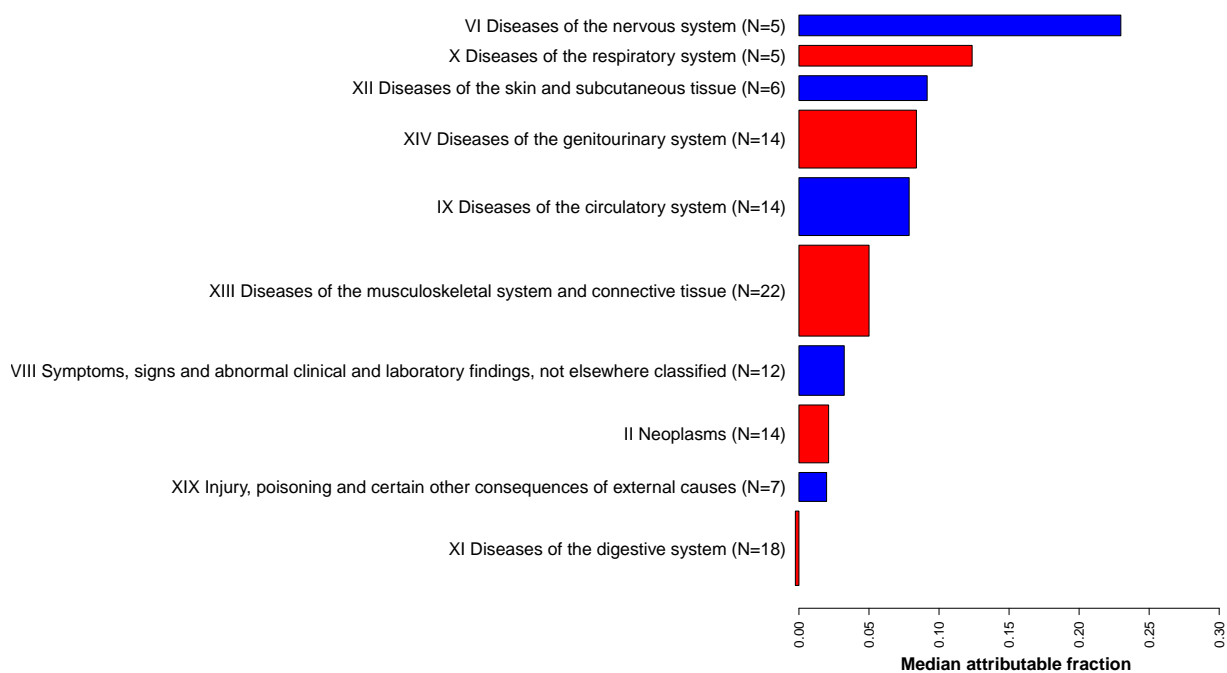

**Attribution fractions for BMI (existing UK Biobank population, versus if all were mid-tertile BMI)**

Figure 3: Median attributable fractions for each ICD-10 chapter with at least 5 diseases where  $A_f > 0.2$ . Bar widths are proportional to the number of diseases in each chapter.
